# Supplementary material for: The TargetMine Data Warehouse: Enhancement and Updates
Source: PubMed Central journal article supplement (PMC6794636; doi:10.3389/fgene.2019.00934), 2019-10-09
Supplement: DataSheet_3.pdf [file DataSheet_3.pdf]

# Supplementary Figure 1: Trans-omics data analysis with TargetMine- usage example

## Trans-omics gene set conversion, comparison and overlap

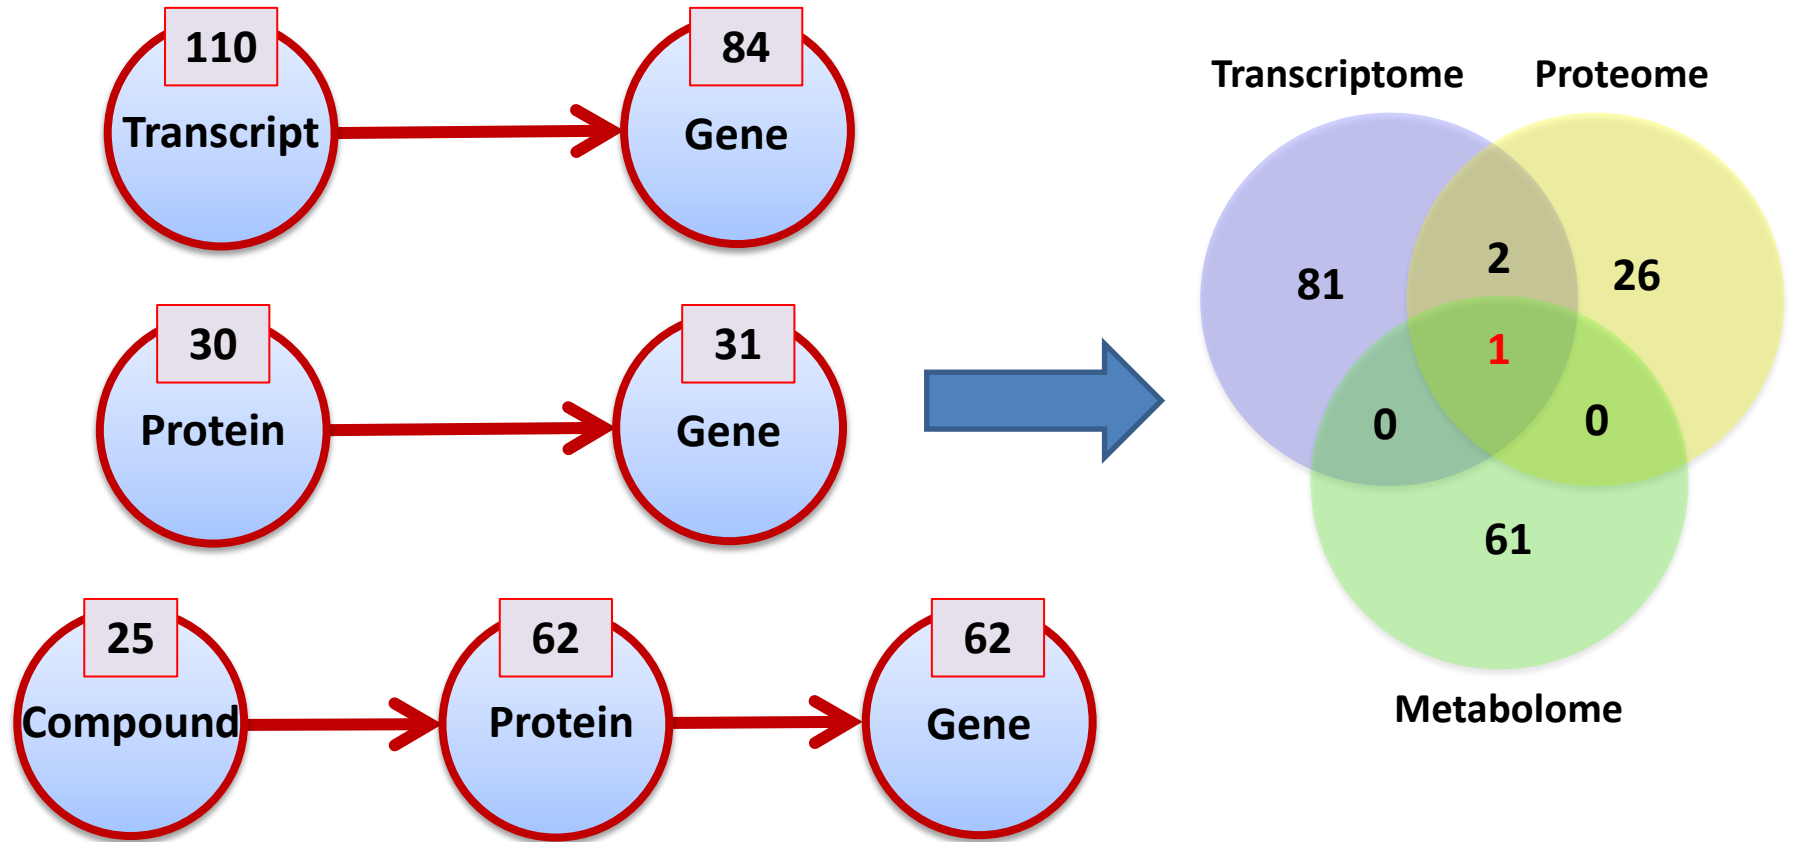

| Gene Name                                              | Gene Symbol | Transcript FC | Protein FC   | Metabolite FC |
|--------------------------------------------------------|-------------|---------------|--------------|---------------|
| carboxylesterase 2A                                    | Ces2a       | 0.591         | 0.657        | -             |
| <b>cysteine sulfinic acid decarboxylase</b>            | <b>Csad</b> | <b>0.544</b>  | <b>0.666</b> | <b>0.643</b>  |
| cytochrome P450, family 3, subfamily a, polypeptide 11 | Cyp3a11     | 0.564         | 0.603        | -             |

## KEGG Pathway overlap- Subclass

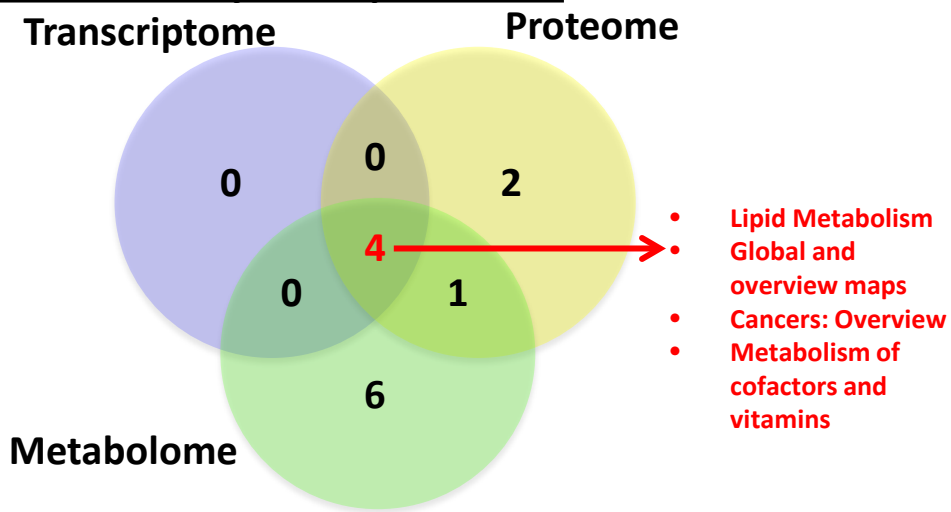

## KEGG Pathway overlap

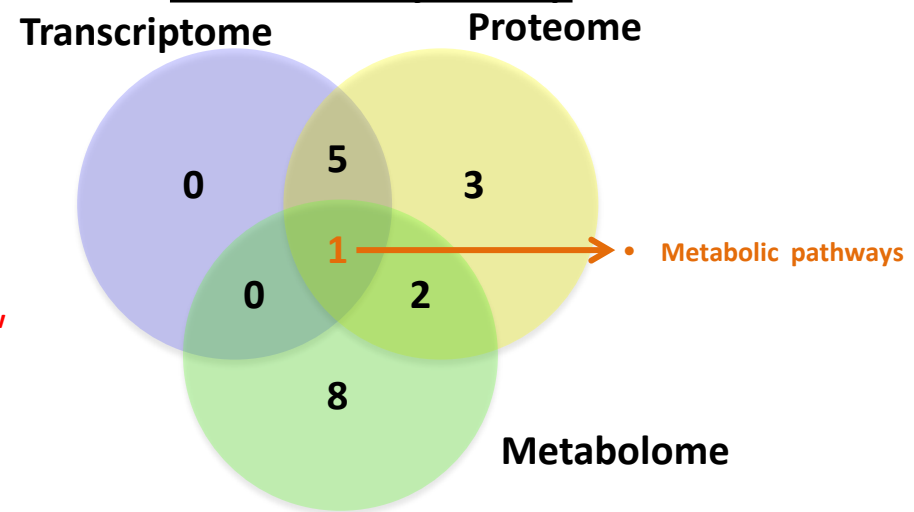

## KEGG Pathway overlap and overlapping genes

| KEGG Pathway                   | KEGG Pathway sub-class               | Transcriptome | Proteome                  | Metabolome                |
|--------------------------------|--------------------------------------|---------------|---------------------------|---------------------------|
| <b>Metabolic pathways</b>      | <b>Global and overview maps</b>      | <b>Csad</b>   | <b>Csad</b>               | <b>Csad</b>               |
| Linoleic acid metabolism       | Lipid Metabolism                     | Cyp3a11       | Cyp3a11                   | -                         |
| Retinol metabolism             | Metabolism of cofactors and vitamins | Cyp3a11       | Cyp3a11                   | -                         |
| Steroid hormone biosynthesis   | Lipid Metabolism                     | Cyp3a11       | Cyp3a11                   | -                         |
| Chemical carcinogenesis        | Cancers: overview                    | Cyp3a11       | Cyp3a11                   | -                         |
| Drug metabolism- other enzymes |                                      | -             | 5 genes (No gene overlap) | 4 genes (No gene overlap) |
